# Supplementary material for: Dual midbrain and forebrain origins of thalamic inhibitory interneurons
Source: eLife journal article supplement (doi:10.7554/elife.59272), 2021-02-01
Supplement: supp [file elife_poa_e59272_Figure_2_figure_supplement_1.docx]

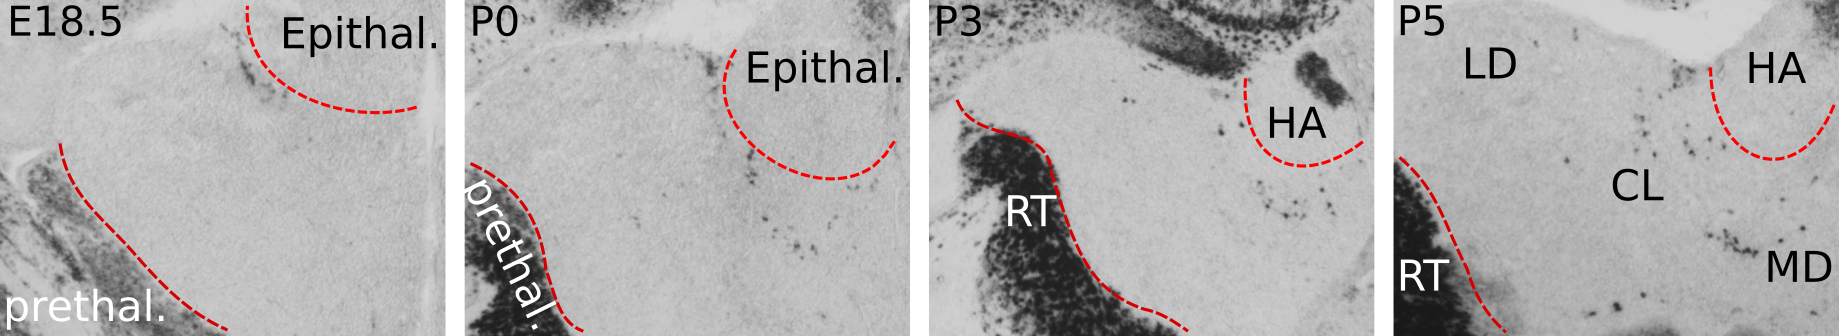


**Figure 2 - Figure supplement 1.** **Perinatal** **distribution of *Gad1+* cells in the anterior thalamus.** Before birth, *Gad1+* cells are not present within rostral thalamic tissue that harbours HO nuclei including the LD, CL and MD. By E18.5, a cluster of *Gad1+* cells is present at the outer edge of the thalamus, bordering the epithalamus. From this location, *Gad1+* cells appear to spread medially first, following the contour of the ventral edge of the habenula (HA), part of the epithalamus. At P0 and during the following 4 days, *Gad1+* cells appear to penetrate thalamic tissue and to scatter in the LD, CL and MD.
