# Supplementary material for: Dual midbrain and forebrain origins of thalamic inhibitory interneurons
Source: eLife journal article supplement (doi:10.7554/elife.59272), 2021-02-01
Supplement: supp [file elife_poa_e59272_Figure_3_figure_supplement_1.docx]

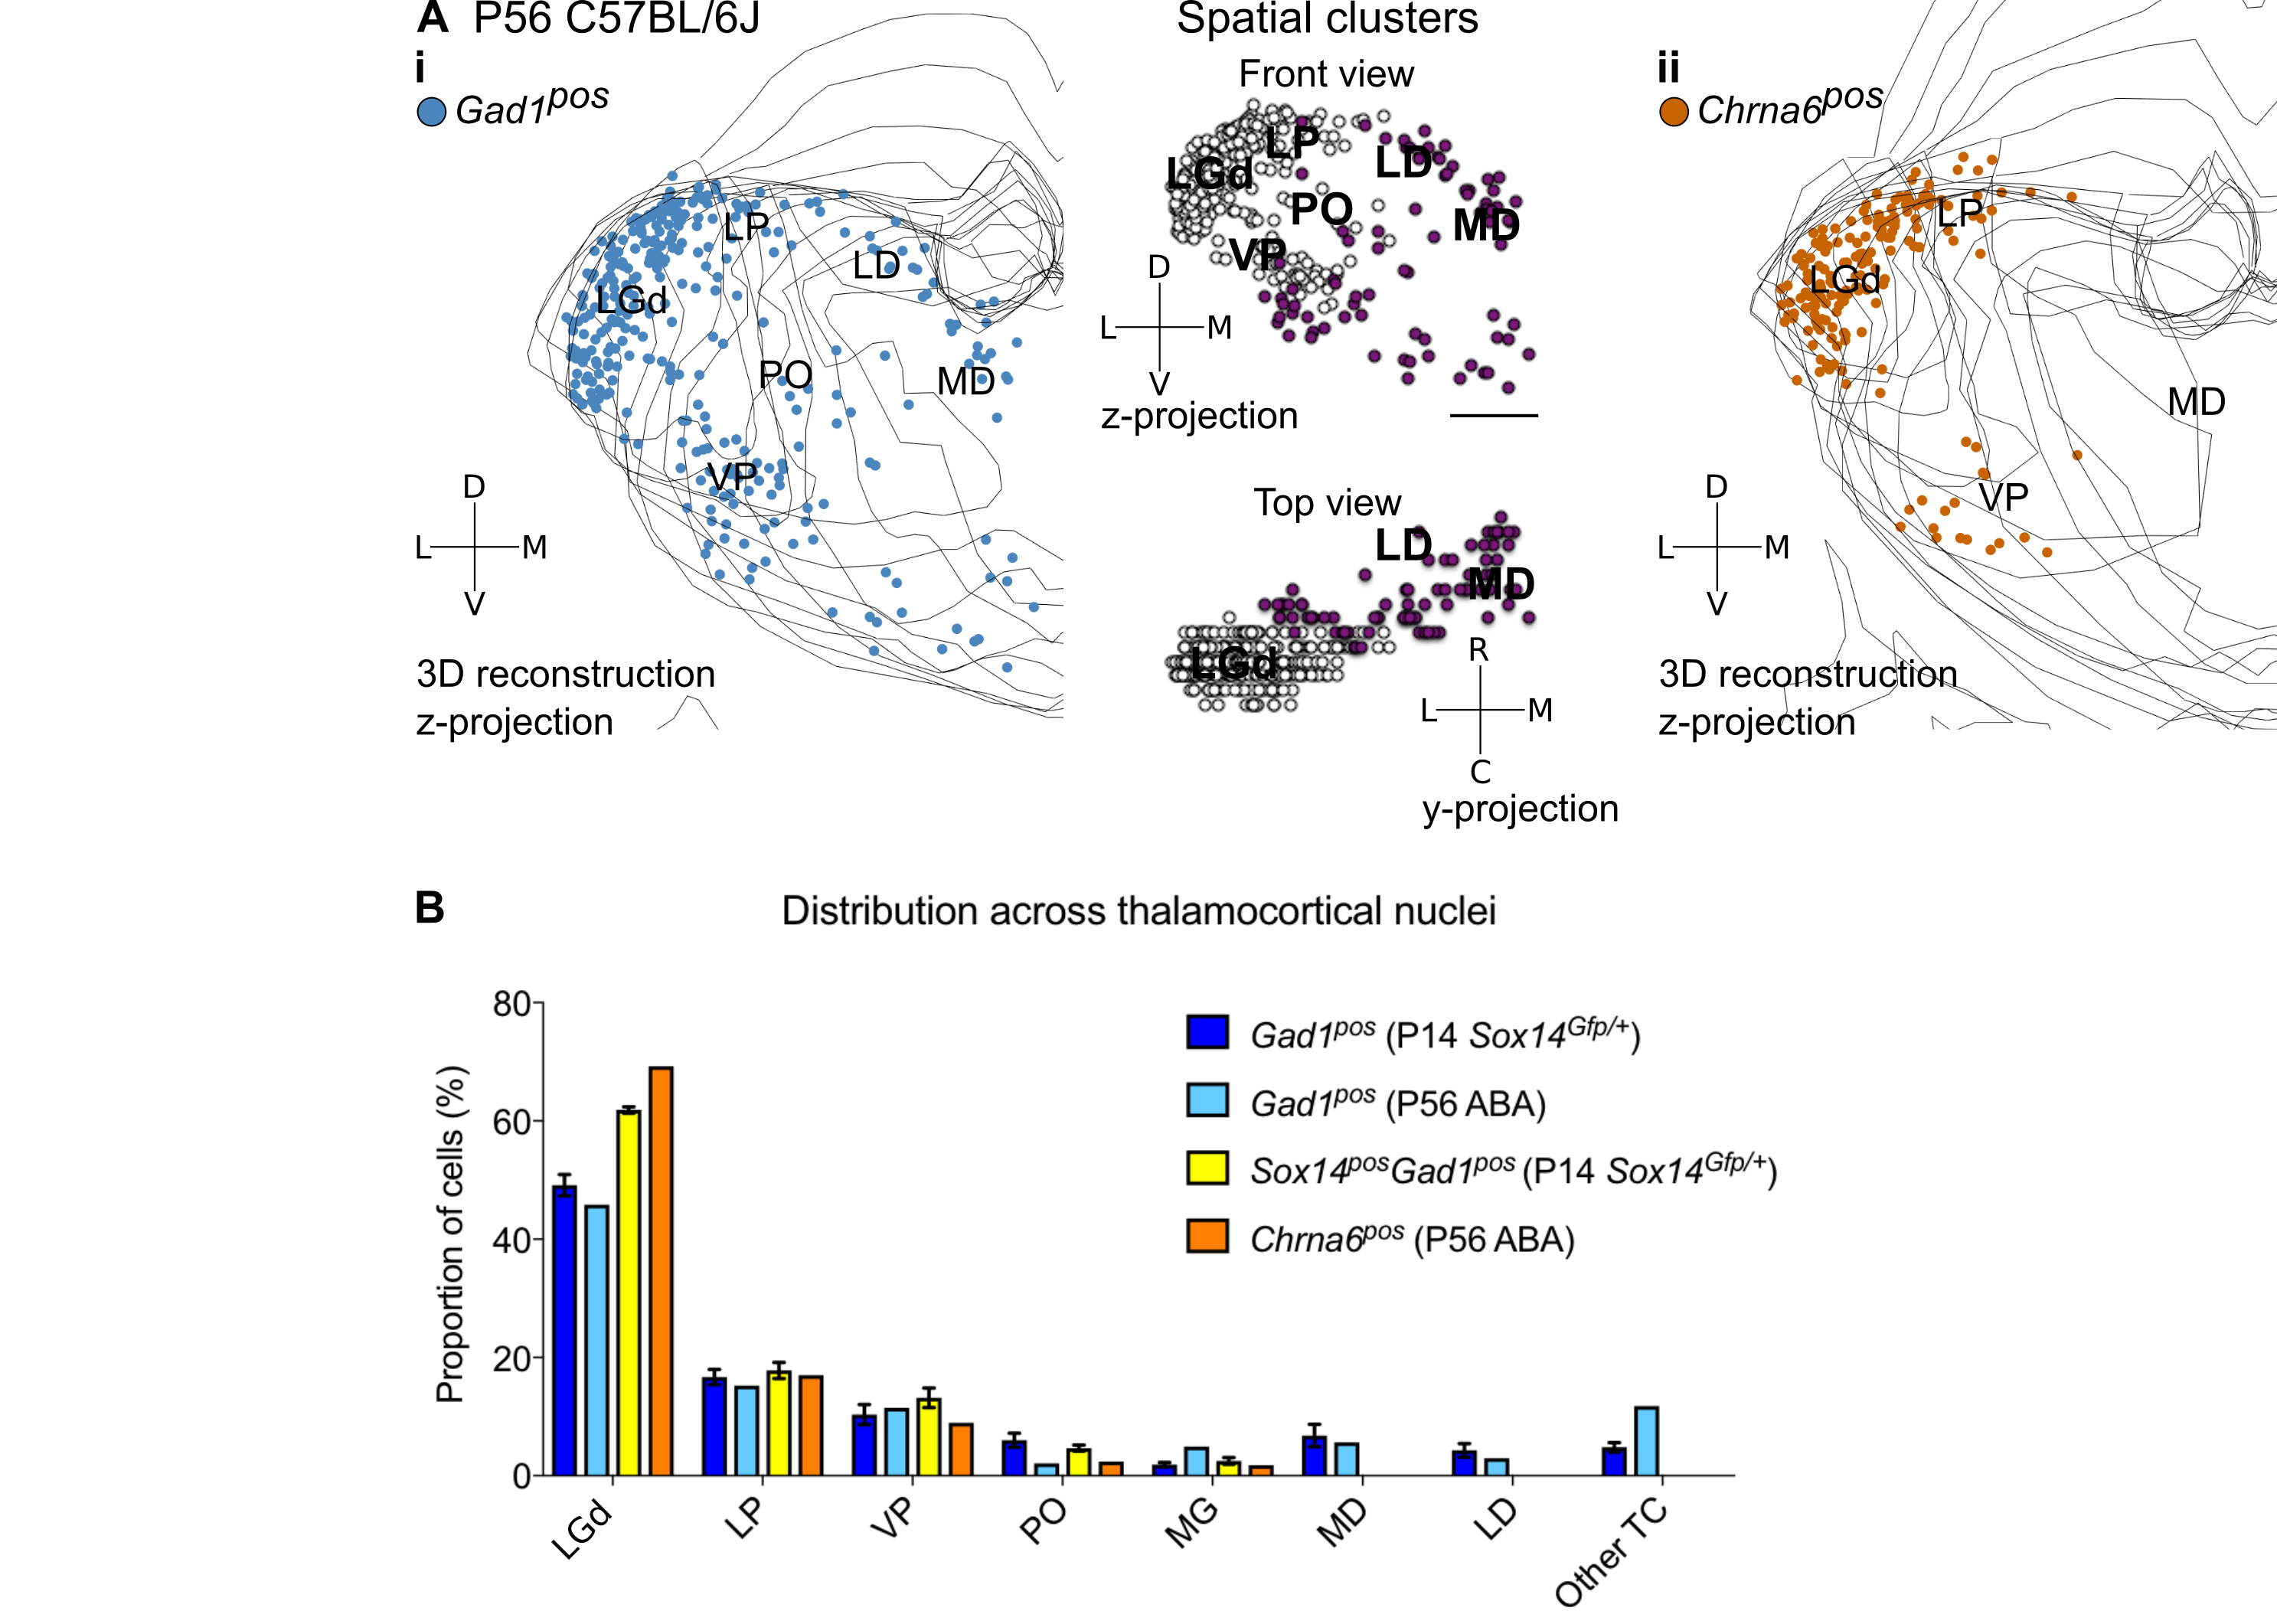


**Figure 3 – Figure supplement 1. A.** 3D reconstruction of a representative P56 mouse thalamus from tracing every eight 25µm-thick coronal section, displayed as a z-projection and showing distribution of (i) *Gad1+* and (ii) *Chrna6+* cells. In (i), k-Means clustering was applied to the data using k=2 (highest silhouette score, 0.512); the resulting spatial clusters are shown as a z- and y-projection and colour-coded. One dot represents one neuron. ISH data was downloaded from the Allen Mouse Brain Atlas (© 2004 Allen Institute for Brain Science. Allen Mouse Brain Atlas. Available from: mouse.brain-map.org; Lein et al., 2006). **B.** Distribution of *Gad1+* and *Chrna6+* cells across TC nuclei (n=1 brain/marker) is compared to all *Gad1+* and *Sox14+Gad1+* cells from P14 *Sox14GFP/+* thalamus (n=3 brains; see also Fig. 2).
