# Supplementary material for: Dual midbrain and forebrain origins of thalamic inhibitory interneurons
Source: eLife journal article supplement (doi:10.7554/elife.59272), 2021-02-01
Supplement: supp [file elife_poa_e59272_Figure_7_figure_supplement_1.docx]

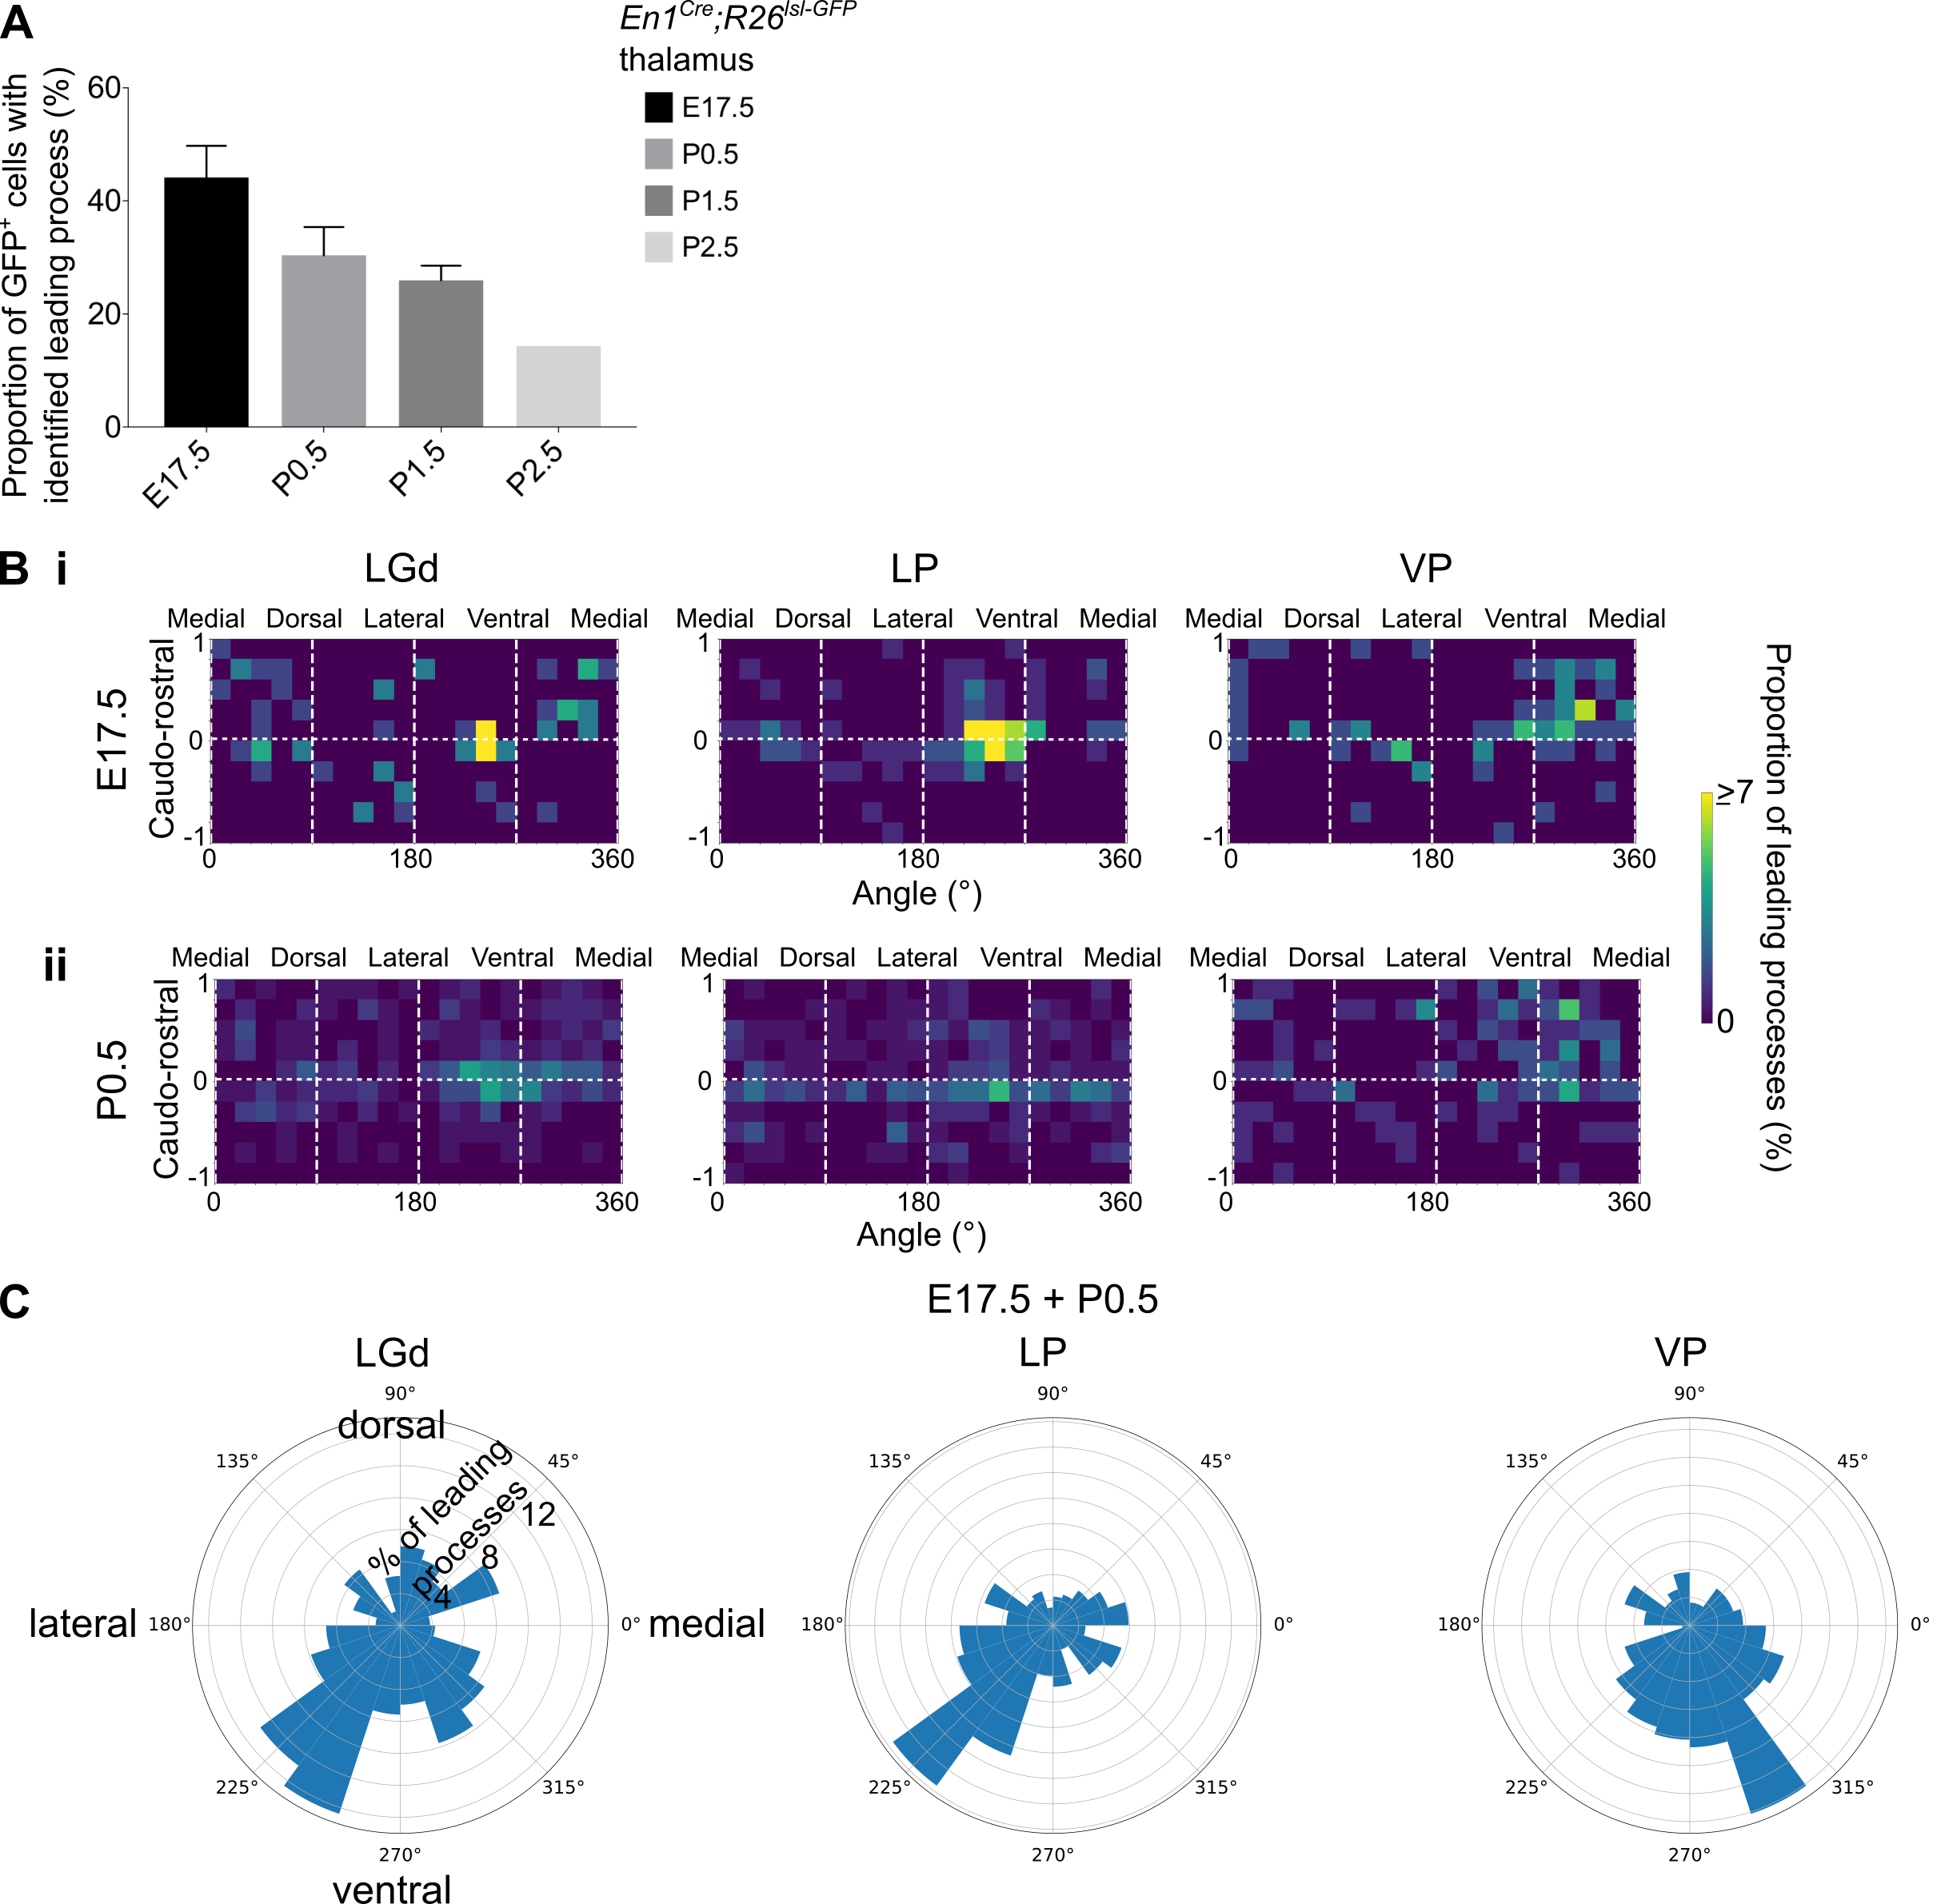


**Figure 7 – Figure supplement 1.** **A.** Proportion of GFP+ cells in the LGd, LP and VP combined, for which a leading process could be identified, in E17.5-P2.5 *En1Cre; Rosa26lsl-GFP*brains (mean±SEM, n=3 brains/developmental stage, apart from P2.5 where n=1 brain). **B.** Frequency distribution of leading process orientation for GFP+ cells in the LGd, LP and VP at (i) E17.5 and (ii) P0.5 separately, represented in heat maps (n=3 brains/developmental stage). **C.** Polar histograms of leading process orientation in the latero-medial and ventro-dorsal plane for GFP+ cells in the LGd, LP and VP at E17.5 and P0 combined (n=3 brains/developmental stage).
