# Supplementary material for: Dual midbrain and forebrain origins of thalamic inhibitory interneurons
Source: eLife journal article supplement (doi:10.7554/elife.59272), 2021-02-01
Supplement: supp [file elife_poa_e59272_Figure_8_figure_supplement_1.docx]

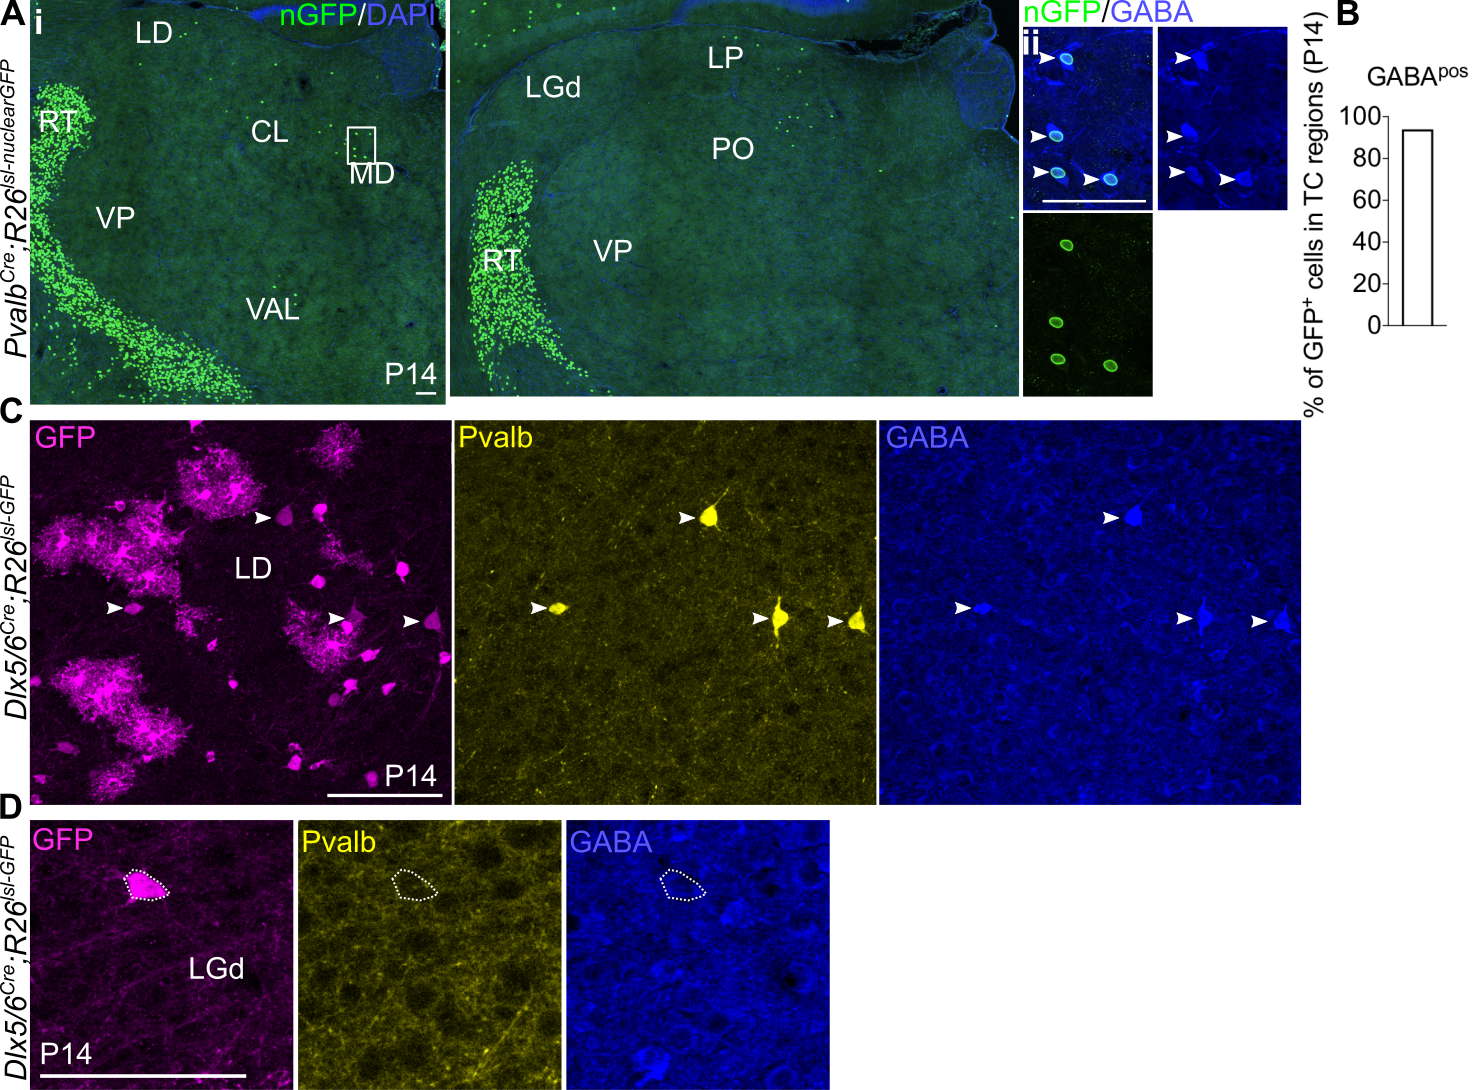


**Figure 8 - Figure supplement 1. A.** (i) Representative coronal sections of P14 *PvalbCre; Rosa26lsl-nuclearGFP*thalamus with GFP+ cells present in the MD, LD, CL, VAL, LP and PO (considering TC regions only). Scale bar, 100µm. (ii) GFP+ cells in TC regions express GABA at P14. Scale bar, 100µm. **B.** Proportion of GFP+ cells in TC regions co-expressing GABA at P14 (mean, n=2 brains). **C.** Clusters of Pvalb-GABA-*Dlx5+* glia-like cells are observed across TC regions in the *Dlx5/6Cre; Rosa26lsl-GFP*line at P14, as shown for the LD. White arrows mark Pvalb+GABA+*Dlx5+* cells. Scale bar, 100µm. **D.** Pvalb-*Dlx5+* cells with neuronal morphology do not express GABA. Scale bar, 100µm.
